# Supplementary material
Source: Royal Society of Chemistry journal article supplement (doi:10.1039/d6cp00543h)
Supplement: d6cp00543h1.pdf [file d6cp00543h1.pdf]

## Supporting Informations

### Phonons Regulate Covalency: A New Way to Modulate Magnetism and Curie Temperature of CrI<sub>3</sub>

Ke Wang<sup>1,\*</sup>, Shuxin Yang<sup>1</sup>, Kai Ren<sup>2</sup>, Yu Wei<sup>1</sup>, Hui Liu<sup>1</sup> and Gang Zhang<sup>3,\*</sup>

1. School of Automation, Xi'an University of Posts and Telecommunications, Shaanxi, 710121, China
2. School of Mechanical and Electronic Engineering, Nanjing Forestry University, Nanjing, Jiangsu, 210042, People's Republic of China
3. Yangtze Delta Region Academy of Beijing Institute of Technology (Jiaxing), Jiaxing, Zhejiang 314019, China

\*Corresponding Author: kewang@xupt.edu.cn (K.W), gangzhang@bit.edu.cn (G.Z)

#### S1. Magnetic ground state of CrI<sub>3</sub> monolayer

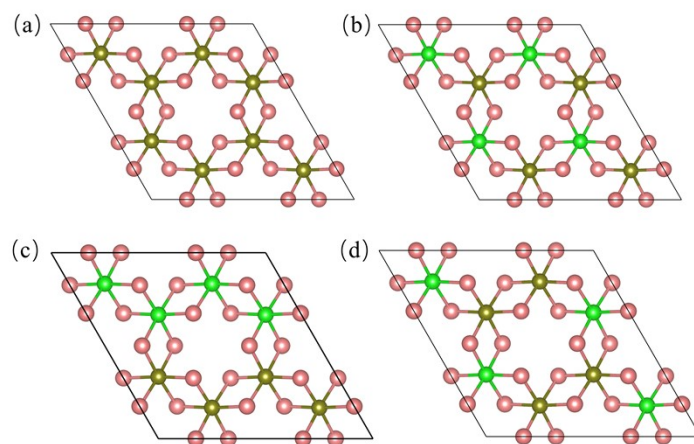

Figure S1. Four impossible magnetic phases for CrI<sub>3</sub> monolayer, including ferromagnetic (FM) (a), antiferromagnetic-Néel (AFM-N) (b), antiferromagnetic-stripy (AFM-S) (c), and antiferromagnetic-Zigzag (AFM-Z) (d). The dark gold and green balls represent the spin up and spin down magnetic lattices, respectively.

## S2. Magnetic properties after imposing phonon modes

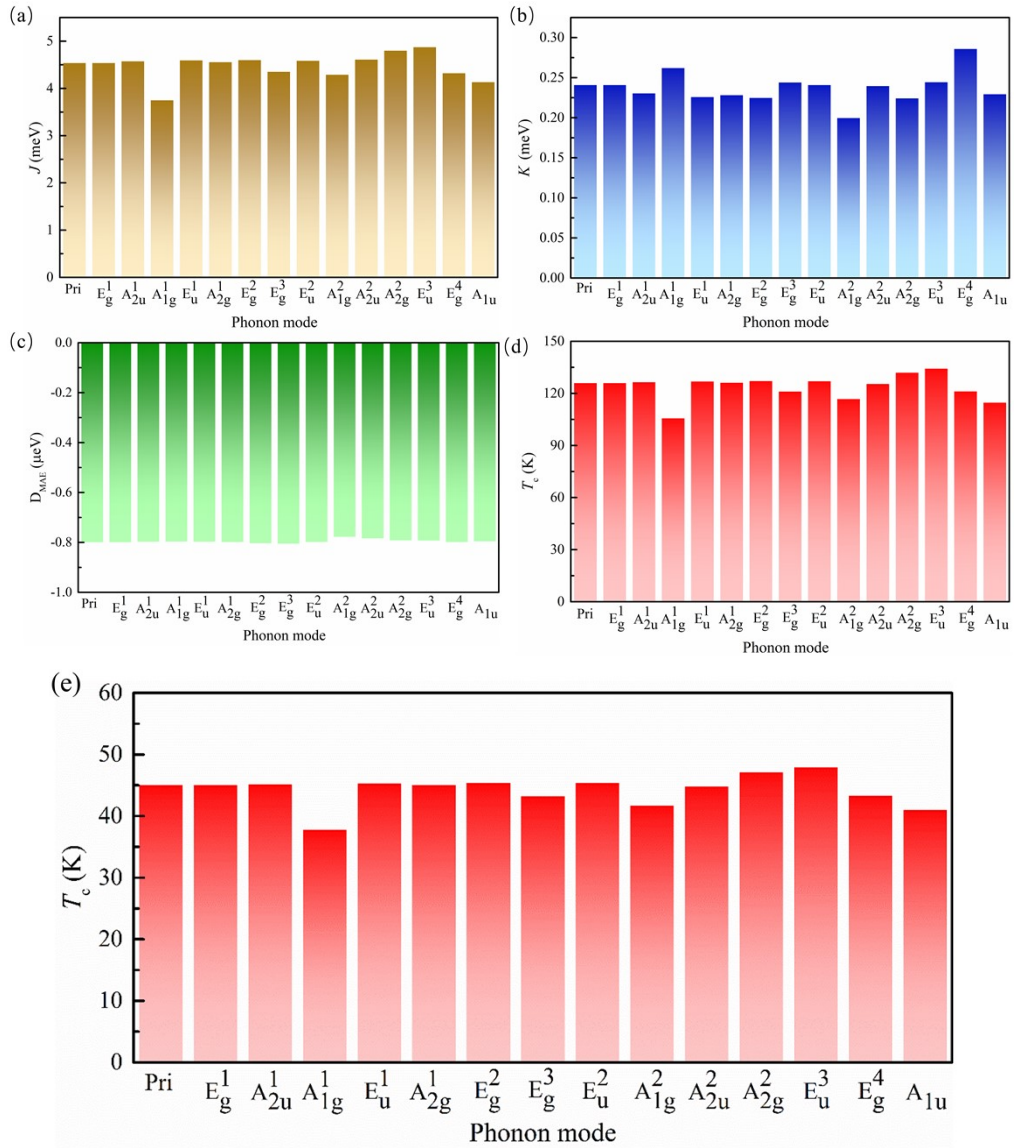

Figure S2. The coefficients of magnetic exchange coupling (a), magnetocrystalline anisotropy (b), the anisotropy of dipole-dipole coupling (c), the Curie temperature (d) after imposing phonon modes and after rescaling (e).

### S3. Spin-wave spectrum before and after imposing phonon vibrations

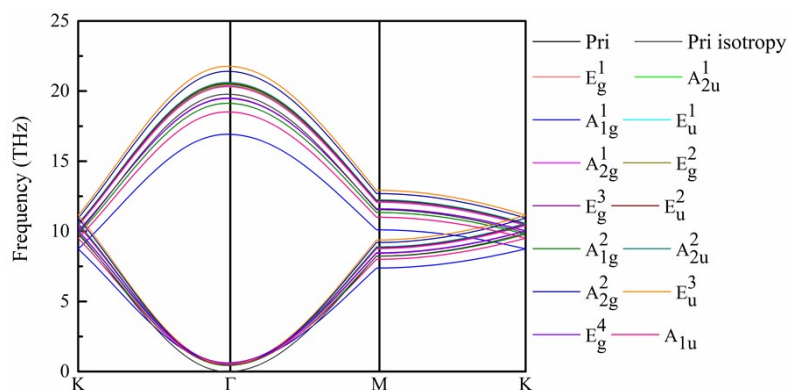

Figure S3. The spin-wave spectrum of CrI<sub>3</sub> monolayer with and without imposing phonon.

### S4. Partial density of state of pristine CrI<sub>3</sub> monolayer

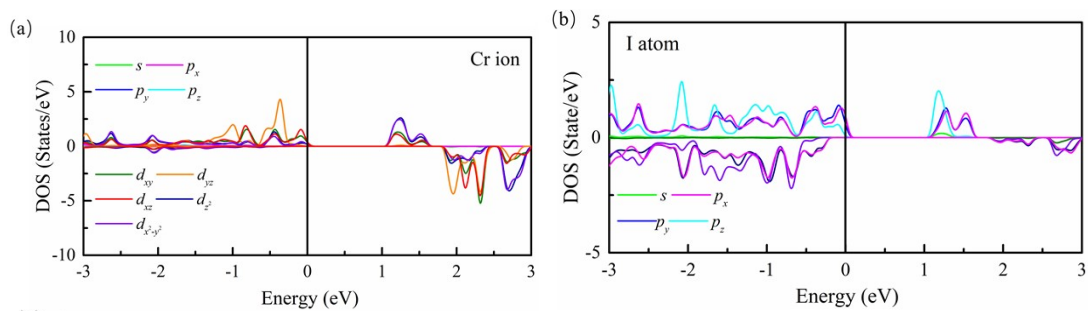

Figure S4. Partial density of state (PDOS) of Cr ion (a) and I (b) atom in pristine CrI<sub>3</sub> monolayer.
